## 1 **Antibiotic degradation by commensal microbes shields pathogens**

2 Mergim Gjonbalaj<sup>1</sup>, James W. Keith<sup>1,2</sup>, Mytrang Do<sup>1,3</sup>, Tobias M. Hohl<sup>1,4</sup>, Eric G. Pamer<sup>1,#</sup>,

3 Simone Becattini<sup>1,§</sup>

4 *1 Immunology Program, Sloan Kettering Institute, Memorial Sloan Kettering Cancer Center, New*  
5 *York, NY, USA*

6 *2 Louis V. Gerstner Jr. Graduate School of Biomedical Sciences, Memorial Sloan Kettering Cancer*  
7 *Center, New York, NY, USA*

8 *3 Weill Cornell Medical College, New York, NY, USA*

9 *4 Infectious Disease Service, Department of Medicine, Memorial Hospital, Memorial Sloan*  
10 *Kettering Cancer Center, New York, NY, USA*

11 *# current address: The Duchossois Family Institute, University of Chicago, Chicago, IL, USA*

12 *§ corresponding author*

13

## 14 **Abstract**

15 The complex bacterial populations that constitute the gut microbiota can harbor antibiotic-  
16 resistance genes (ARGs), including those encoding for  $\beta$ -lactamase enzymes (BLA), which  
17 degrade commonly prescribed antibiotics such as ampicillin. While it is known that ARGs can be  
18 transferred between bacterial species, with dramatic public health implications, whether  
19 expression of such genes by harmless commensal bacterial species shields antibiotic-sensitive  
20 pathogens *in trans* by destroying antibiotics in the intestinal lumen is unknown. To address this  
21 question, we colonized GF mice with a model intestinal commensal strain of *E. coli* that  
22 produces either functional or defective BLA. Mice were subsequently infected with *Listeria*

23 *monocytogenes* or *Clostridioides difficile* followed by treatment with oral ampicillin. Production  
24 of functional BLA by commensal *E. coli* markedly reduced clearance of these pathogens and  
25 enhanced systemic dissemination during ampicillin treatment. Pathogen resistance was  
26 independent of ARG acquisition via horizontal gene transfer but instead relied on antibiotic  
27 degradation in the intestinal lumen by BLA. We conclude that commensal bacteria that have  
28 acquired ARGs can mediate shielding of pathogens from the bactericidal effects of antibiotics.

29

### 30 **Importance**

31 The wide use of antibiotics in human populations and in livestock has led to increasing  
32 prevalence of pathogenic and commensal bacterial species that harbor antibiotic resistance  
33 genes (ARGs), such as those encoding for ampicillin-degrading  $\beta$ -lactamases. We investigated  
34 whether harmless autochthonous bacteria might degrade orally administered antibiotics,  
35 thereby impairing their ability to combat intestinal pathogens. Here we report that antibiotic  
36 degradation by a resident intestinal strain of *E. coli* reduces the effectiveness of oral ampicillin  
37 against two intestinal pathogens, *L. monocytogenes* and *C. difficile*, resulting in increased  
38 intestinal and systemic bacterial burden. We demonstrate that expression of ARGs by non-  
39 pathogenic members of the gut microbiota shields antibiotic-sensitive pathogens and enhances  
40 their expansion and dissemination.

41

42

### 43 **Observation**

44 Antibiotic administration has markedly reduced the morbidity and mortality associated with  
45 bacterial infections in the pre-antibiotic era. Increasing antibiotic-resistance in pathogenic  
46 microbes, mediated in part by acquired genes that encode antibiotic-degrading enzymes,  
47 represents a major threat to human health (1).

48 The gut microbiota contains trillions of commensal bacteria that can also harbor  
49 antibiotic resistance genes (ARGs) (2). Notably, antibiotic exposure can increase ARG gene  
50 representation and expression by the gut microbiota (3). Horizontal ARG transfer represents a  
51 mechanism by which drug-sensitive microbes can acquire resistance, e.g. by acquisition of  
52 genes encoding antibiotic-degrading hydrolases (4, 5). Thus, it is possible that commensal  
53 bacterial species transfer ARGs to intestinal pathogens upon antibiotic exposure in the gut  
54 lumen. However, another possibility is that production of antibiotic-degrading enzymes by the  
55 resident microbiota protects otherwise drug-sensitive pathogens *in trans*, thereby facilitating  
56 their replication and spread in the host.

57 To test this hypothesis in a controlled system, we reconstituted germ-free (GF) mice  
58 with an *E. coli* strain, utilized here as a model commensal, that expresses either a WT form of  $\beta$ -  
59 lactamase (TEM-1) or an inactive point mutant (hereby referred to as *WT* BLA or *mut* BLA,  
60 respectively) (Figure 1A) (6). This approach yielded cohorts of mice that, with the exception of  
61 one codon, harbor identical genomes, thus excluding differences in microbiota functions (e.g.,  
62 immune activation, colonization resistance, etc.) that are not related to the  $\beta$ -lactam  
63 degradation.

64 Although *WT* BLA and *mut* BLA *E. coli* reached identical luminal bacterial densities in  
65 reconstituted mice, a colorimetric assay confirmed that only the intestinal content of mice

66 reconstituted with *WT* BLA *E. coli* retained the capacity to hydrolyze  $\beta$ -lactams (Figure 1 B, C).  
67 One week after reconstitution, mice were orally infected with the foodborne pathogen *Listeria*  
68 *monocytogenes* 10403s (*Lm*). *Lm* is highly sensitive to  $\beta$ -lactam antibiotics and can expand in  
69 the gut lumen of mice that lack colonization resistance (7). Mice were then administered  
70 ampicillin on day +1 and +2 post *Lm* infection and sacrificed on day +3. As expected, *Lm* reached  
71 identical densities in the intestines of *WT* BLA or *mut* BLA *E. coli* reconstituted mice on day +1,  
72 indicating that the 2 *E. coli* strains did not differ in their inability to provide colonization  
73 resistance against *Lm*. However, we found significantly higher *Lm* burden in multiple organs in  
74 mice harboring *WT* BLA *E. coli* on day +3, consistent with the notion that  $\beta$ -lactamase-  
75 dependent ampicillin degradation shielded *Lm* from the therapeutic antibiotic's action.  
76 To exclude the possibility that *Lm* might have acquired resistance to ampicillin via horizontal  
77 gene transfer, we inoculated single *Lm* colonies recovered from the cecal content of *WT* BLA *E.*  
78 *coli*-reconstituted, *Lm*-infected mice, into liquid medium either in the presence or absence of  
79 ampicillin. Notably, none of the inoculated *Lm* colonies grew in the presence of ampicillin, in  
80 contrast to *WT* BLA-expressing *E. coli* colonies recovered from the same mice (Figure 1F).  
81 Furthermore, none of the *Lm* colonies tested positive for the presence of the  $\beta$ -lactamase gene,  
82 which was uniformly detected in colonies of *WT* BLA *E. coli* by PCR (Figure 1G).

83 To confirm that the increased *Lm* burden observed above was due to antibiotic  
84 degradation by resident *E. coli*, we collected the cecal contents of mice reconstituted with  
85 either *WT* BLA or *mut* BLA *E. coli* and treated with ampicillin in the drinking water for two  
86 consecutive days to allow for luminal accumulation of the antibiotic. Inoculation of *Lm* into  
87 serial dilutions of the cecal content supernatants revealed that the cecal contents from mice

88 reconstituted with *mut* BLA *E. coli* had a higher inhibitory capacity compared to cecal contents  
89 recovered from mice reconstituted with *WT* BLA *E. coli* (Figure 1G and Supplementary Figure 1).  
90 Since the presence of active  $\beta$ -lactamase was the only *bona fide* difference between the cecal  
91 contents of the two cohorts of mice, we conclude that the microbiota-encoded enzymatic  
92 activity curtailed the efficacy of ampicillin treatment against *Lm*.

93  
94 To expand our observations beyond the *Listeria* model, and to assess whether commensal-  
95 mediated antibiotic degradation may represent a mechanism that is relevant to other infectious  
96 agents, we adapted our experimental strategy to an established *C. difficile* infection model (8)  
97 (Figure 2A), an important intestinal pathogen that is also sensitive to ampicillin (Supplementary  
98 Figure 2). Of note, this model allowed us to investigate the relevance of our findings in a setting  
99 where expansion of an antibiotic-resistant microbe takes place following antibiotic-mediated  
100 depletion of the intestinal microbiota, a common occurrence in hospitalized patients (9).

101 Similar to the results obtained with *Lm*, we observed indistinguishable levels of expansion for  
102 both *E. coli* and *C. difficile* on day +1 after reconstitution or infection, respectively, in all groups  
103 of mice (Figure 2B, C). In agreement with our previous findings, the *C. difficile* burden was  
104 significantly reduced by ampicillin treatment in mice reconstituted with *mut* BLA *E. coli*, but not  
105 in mice reconstituted with *WT* BLA *E. coli* (Figure 2D). Direct comparison of the ampicillin-  
106 treated mice confirmed a significantly higher burden in mice whose intestinal flora had the  
107 capacity to hydrolyze  $\beta$ -lactams (Figure 2D).

108

109 These findings suggest that ARGs expressed by commensal bacteria can shape the chemical  
110 niche of the intestine and confer an apparent antibiotic resistant phenotype to pathogens in  
111 trans, without direct acquisition of ARGs by the pathogenic microbe. We refer to this activity as  
112 *commensal-mediated pathogen shielding*. Using two different infection models, we show that  
113 production of  $\beta$ -lactamases, a prototypical antibiotic resistance factor, by resident intestinal  
114 microbes can significantly reduce the effectiveness of ampicillin treatment, thereby generating  
115 a safe environment in which otherwise sensitive pathogens are shielded from this drug.  
116 Importantly, previous studies in healthy volunteers demonstrated that upon treatment with  
117 cephalosporins, subjects harboring BLA-producing commensal strains, unlike BLA-negative  
118 subjects, had undetectable concentrations of the drug in the feces and maintained a rich  
119 microbiota, providing evidence that BLA concentrations sufficient to inactivate antibiotics are  
120 commonly achieved in humans (10, 11).

121

122 Whether or not ARGs enrichment within the gut microbiota is detrimental to host health is a  
123 complex question, and the answer is likely to be context-dependent.

124 For instance, oral administration of recombinant beta lactamase or BLA-producing bacteria was  
125 shown to preserve the integrity of the microbiota following parenteral administration of beta-  
126 lactam antibiotics in animal models, without affecting drug concentration in the serum (12-17).

127 These approaches were shown to be advantageous in that they preserved colonization  
128 resistance against pathogens (12-17).

129 On the other hand, early work (reviewed in (18)) revealed that beta-lactamase-producing, non-  
130 pathogenic bacteria, can hinder the efficacy of penicillins *in vitro* and *in vivo*, using models of

131 subcutaneous and tonsil infection. Clinical data also suggested that the presence of one beta-  
132 lactamase-producing bacterial strain at the site of infection could enhance persistence of a  
133 pathogen upon antibiotic treatment (19). In these settings, members of the *Bacteroides* genus,  
134 among the most highly represented genera in the human intestine(20), were also identified as  
135 BLA-carriers.

136 Consistent with these observations, our laboratory recently showed that a few bacterial strains,  
137 out of the dozens composing the microbiota of a mouse colony treated with ampicillin for over  
138 8 years, had the capacity to hydrolyze ampicillin, while the other bacterial strains, in isolation,  
139 remained sensitive to ampicillin and thus were protected *in trans* by a minor subset of the  
140 microbiota (21)(see Figure 4A in (22)).

141

142 In conclusion, we propose that *commensal-mediated pathogen shielding* can impair the  
143 effectiveness of some antibiotic treatments during infection. While pharmacokinetic studies  
144 have generally focused on antibiotic absorption, distribution, enzymatic modification, protein  
145 binding and biliary/renal clearance, the role of microbiota-mediated antibiotic degradation in  
146 the gut lumen and its potential for dramatically impacting responses to antibiotic treatment has  
147 received less attention. Our findings extend the recently uncovered broad capacity of the gut  
148 microbiota to metabolize drugs, affecting their efficacy (23, 24). Within this model, antibiotics  
149 represent an additional class of xenobiotics that commensals can metabolize.

150 Our study suggests that presence or absence of commensal bacterial strains that inactivate  
151 beta-lactam antibiotics is likely to impact clinical responses to antibiotic treatment, possibly  
152 contributing to inter-individual variability in therapy outcomes. Furthermore, the occurrence of

153 *pathogen shielding* might be a relevant element to consider in the engineering of probiotic

154 bacterial strains to be employed in clinical practice.

155

156

157



158 **Figure captions**

159 **Figure 1.  $\beta$ -lactamase production by a model commensal curtails the efficacy of ampicillin**

160 **against *Listeria monocytogenes*. A)** Schematic representation of the experimental design. **B)**

161 Nitrocefin assay performed on resuspended fecal pellets obtained from the depicted groups of  
162 mice. Each well represents a different mouse, one representative experiment of three shown.

163 **C)** Reconstitution levels for the depicted *E. coli* strains as measured by plating fecal pellets on  
164 day 7 post-reconstitution (day of infection) onto selective plates (n=8-10, data pooled from 2  
165 independent experiments, shown are individual data points and geometric mean).

166 **D)** Luminal *Lm* burden in the depicted mice 1 day post infection, measured by plating fecal  
167 pellets onto selective plates. **E)** *Lm* burden in the depicted compartments at day 3 post  
168 infection (D,E: n=12, data pooled from 3 independent experiments, shown are individual data  
169 points and geometric mean. Mann-Whitney test: \*=p<0.05, \*\*=p<0.01, \*\*\*=p<0.001). **F)**

170 Individual *Lm* colonies (28) or *WT* BLA *E. coli* colonies (4) from 4-5 different mice were  
171 inoculated into BHI +/- ampicillin. OD was measured after o.n. culture. **G)** Colonies utilized for  
172 the experiment depicted in F) were also subjected to PCR with primers specific for the TME-1  $\beta$ -  
173 lactamase gene or p60 (*Lm* positive control). Shown are results for 6 *Lm* colonies and 1 *E. coli*

174 colony; identical results were obtained for all tested colonies. **H)** The cecal content of *WT* mice  
175 reconstituted with either *WT* or *mut* BLA *E. coli* and administered ampicillin in drinking water  
176 for two days was serially diluted and inoculated with *Lm*. *Lm* growth was assessed after o.n.  
177 culture by measurement of OD and direct plating (one representative plate shown on the left).

178 Plotted values correspond to the first dilution allowing for detectable *Lm* growth (with 1

179 indicating *Lm* growth at all dilutions) (n=3, shown is mean  $\pm$  SD). Similar results were obtained  
180 utilizing antibiotic-treated, *E. coli*-reconstituted animals (see Supplementary Figure 1).

181

182 **Figure 2. Endogenous antibiotic degradation impacts treatment of *C. difficile* infection. A)**

183 Schematic representation of the experimental design. **B)** Reconstitution levels for mice

184 reconstituted with either *WT* or *mut* BLA *E. coli* (as depicted in A), one day post oral gavage as

185 assessed by selective plating of fecal pellets (n=14, data pooled from 2 independent

186 experiments, shown are individual data points and geometric mean). **C)** *C. difficile* burden in

187 mice treated as depicted in A), one day post oral gavage, as assessed by selective plating of

188 fecal pellets (n=14, data pooled from 2 independent experiments, shown are individual data

189 points and geometric mean). **D)** *C. difficile* burden in the cecal content of mice treated as

190 depicted in A) at day 3 post infection (n=7 for controls, n=12 for amp-treated, data pooled from

191 3 independent experiments, shown are individual data points and geometric mean; Kruskal-

192 Wallis test with multiple comparisons: \*=p<0.05, \*\*=p<0.01).

193

194 **Supplementary Figure 1. Confirmation of differential anti-listerial activity of cecal contents in**

195 ***WT* BLA vs *mut* BLA *E. coli*-reconstituted *WT* mice.** C57Bl/6 mice were treated with a

196 combination of metronidazole, neomycin and vancomycin for 3 days and reconstituted with

197 either *WT* or *mut* BLA *E. coli*. 7 days following reconstitution mice were administered ampicillin

198 in drinking water for 2 days, prior to sacrifice. *Lm* was cultured in serial dilutions of the cecal

199 contents, and growth was assessed after o.n. incubation. To account for variability across

200 experiments, *Lm* inhibition calculated as 1/first cecal dilution allowing *Lm* growth was

201 normalized so that the average value for *WT* BLA ceca would be equal to 1 in each experiment  
202 (n=9-10 mice from 3 different experiments, shown is mean  $\pm$  SD, Mann-Whitney test:  
203 \*=p<0.05).

204

205 **Supplementary Figure 2. Ampicillin sensitivity of *C. difficile*.** *C. difficile* was grown to stationary  
206 phase and inoculated in medium with different concentrations of ampicillin. Shown is OD600  
207 measured after o.n. incubation at 37°C in anaerobic conditions (n=3 technical replicates).

208

## 209 **Methods**

### 210 **Mouse Husbandry**

211 All experiments using wild-type mice were performed with C57BL/6J female mice that were 6–8  
212 weeks old; mice were purchased from Jackson Laboratories. Germ-free (GF) mice were bred in-  
213 house in germ-free isolators. Following reconstitution mice were housed in sterile, autoclaved  
214 cages with irradiated food and acidified, autoclaved water. All animals were maintained in a  
215 specific-pathogen-free facility at Memorial Sloan Kettering Cancer Center Animal Resource  
216 Center. Experiments were performed in compliance with Memorial Sloan-Kettering Cancer  
217 Center institutional guidelines and approved by the institution’s Institutional Animal Care and  
218 Use Committee.

219

### 220 **Generation of *E. coli* strains**

221 Plasmids encoding for WT TEM-1  $\beta$ lactamase (pDIMC8-TEM1) or mutated TEM-1  $\beta$ lactamase  
222 (pDIMC8-TEM1 W208G) were extracted from the RH06 and RH09 *E. coli* strains, published

223 elsewhere (6), gel-purified and utilized for transformation of Stellar competent cells (Takara  
224 Bio) according to manufacturer's instructions. The resulting strains were utilized for  
225 experiments throughout this study. Of note, the plasmids conferred resistance to  
226 chloramphenicol, and while expression of the TEM-1 gene was placed under the regulation of a  
227 tac promoter, we did not induced it by IPTG treatment, but rather exclusively relied on leaky  
228 transcription of the gene, to produce more physiologically-relevant conditions.

229

### 230 **Antibiotic treatment, reconstitution and infections**

231 GF mice were gavaged with either of two strains of *E. coli*, encoding for a functional or a point-  
232 mutated version of TEM-1  $\beta$ -lactamase, respectively. 1 week post reconstitution mice were  
233 gavaged with  $10^9$  CFUs of *L. monocytogenes* (*Lm*) strain 10403s and administered 1 mg of  
234 ampicillin (Fisher) by oral gavage daily for 2 consecutive days. Animals were euthanized at day 3  
235 post infection. Reconstitution of WT mice with *E. coli* strains for in vitro experiments involving  
236 dilution of cecal content, mice were treated for 3 days with metronidazole and vancomycin in  
237 drinking water (0.5 g/l), left on regular water for 1 day, and then gavaged with the appropriate  
238 *E. coli* strain. 1 week post reconstitution mice were treated with ampicillin in drinking water  
239 (0.5 g/l) for two days prior to being euthanized.

240 For *C. difficile* infection experiments, WT C57Bl/6 mice were administered a combination of  
241 metronidazole, neomycin and vancomycin (0.25 g/l each) in drinking water for 3 days, and 24h  
242 post antibiotic regimen cessation were injected i.p. with clindamycin (200  $\mu$ g). On the following  
243 day mice were reconstituted with either *WT* or *mut* BLA *E. coli* ( $5 \times 10^4$  CFUs) and 200-500 spores  
244 of *C. difficile* strain VPI10463 (ATCC #43255).

245

246 **CFUs enumeration and Selective plating**

247 *L. monocitogenes* was identified through plating of serial dilutions of homogenized organs  
248 (prepared as described elsewhere (7)) or fecal material (resuspended 100 mg/ml in PBS) onto  
249 BHI plates supplemented with streptomycin (100 µg/ml) and nalidixic acid (50 µg/ml).

250 *E. coli* CFUs were enumerated following plating of serial dilution of fecal material onto LB plates  
251 supplemented with chloramphenicol (50 µg/ml). *E. coli* CFU numbers obtained from plating of  
252 ex-GF mice at day of infection onto LB plates (not supplemented with antibiotics) yielded  
253 identical numbers, indicating that plasmids carrying CM resistance cassette as well as the  
254 *WT/mut* BLA gene were maintained even in the absence of any selective pressure.

255 For detection of *C. difficile*, fecal pellets or cecal content were resuspended in deoxygenated  
256 phosphate-buffed saline (PBS), and ten-fold dilutions were plated on BHI agar supplemented  
257 with yeast extract, taurocholate, L-cysteine, cycloserine and ceftiofur at 37°C in an anaerobic  
258 chamber (Coylabs) overnight.

259

260 ***Lm* culture in cecal content**

261 Cecal contents were recovered from *E. coli* reconstituted WT or GF animals, resuspended in PBS  
262 at 300 mg/ml (WT) and spun down at 3000 rpm for 10'. Serial 1:2 dilutions of the resulting  
263 supernatant were generated using PBS and 100 µl of each dilution were plated in replicate in  
264 flat bottom 96 well plates. An equal volume of BHI medium supplemented with streptomycin  
265 (200 µg/ml) and nalidixic acid (100 µg/ml) acid (to prevent growth of residual *E. coli*) containing  
266 100-1000 CFUs *Lm* 10403s, was added on top. *Lm* for this assay was prepared by re-inoculating

267 an overnight culture in liquid BHI at 37°C on shaker, until logarithmic phase of growth was  
268 reached (OD=0.1-0.4). After an overnight incubation at 37°C, the plate was assayed by OD 600  
269 reading and individual dilutions plated onto BHI-Strep-NA plates for assessment of *Lm* growth.  
270 Normalized inhibition index was calculated as 1/first dilution allowing for *Lm* growth, with the  
271 initial dilution being 1:2 to take into account the addition of a volume of BHI equivalent to that  
272 of the medium. For example, if the first dilution where *Lm* was detected was 1:16, the resulting  
273 inhibition index would be 16. Within each experiment samples were then normalized to the  
274 baseline, obtained by averaging the values obtained in the control group, represented by mice  
275 reconstituted with *mut* BLA *E. coli*.

276

#### 277 **PCR**

278 PCR for was carried out using the following primers:  $\beta$ -lactamase (fw: 5'-  
279 GCTATGTGGCGCGGTATTAT-3'; rev: 5'-AAGTAAGTTGGCCGAGTGT-3', product: 191 bp); p60  
280 (fw: 5'-GCGCAACAACTGAAGCAAAGGATGC-3'; rev: 5'-CTCGCGTTACCAGGCAAATAGATGGACG-  
281 3', product: 1300 BP), using the SapphireAmp Fast PCR master mix (Takara Bio) and the  
282 following conditions: 94°C x 1', 30 x (98°C x 5'', 58°C x 5'', 72°C x 15'').

283

#### 284 **Acknowledgments**

285 We thank Ying Taur and Peter McKenney for critical discussion of the manuscript. RH06 and  
286 RH09 *E. coli* strains carrying the pDIMC8-TEM1 and pDIMC8-TEM1 W208G plasmids were a kind  
287 gift of Prof. Marc Ostermeier (Johns Hopkins University). This work was supported by NIH grant

288 P30 CA008748 (to MSKCC), Burroughs Wellcome Fund Investigator in the Pathogenesis of  
289 Infectious Disease Awards (T.M.H.).

290 S.B. was supported by an Early Postdoc Mobility Fellowship from the Swiss National Science  
291 Foundation (P2EZP3\_159083) and an Irvington Fellowship from the Cancer Research Institute  
292 (49679).

293

294 **Competing financial interests:** E.G.P. has received speaker honoraria from Bristol Myers  
295 Squibb, Celgene, Seres Therapeutics, MedImmune, Novartis and Ferring Pharmaceuticals and is  
296 an inventor on patent application # WPO2015179437A1, entitled “Methods and compositions  
297 for reducing *Clostridium difficile* infection” and #WO2017091753A1, entitled “Methods and  
298 compositions for reducing vancomycin-resistant enterococci infection or colonization” and  
299 holds patents that receive royalties from Seres Therapeutics, Inc.

300

301

- 302 1. **Nikaido H.** 2009. Multidrug resistance in bacteria. *Annu Rev Biochem* **78**:119-146.
- 303 2. **Rolain JM.** 2013. Food and human gut as reservoirs of transferable antibiotic resistance  
304 encoding genes. *Front Microbiol* **4**:173.
- 305 3. **Jernberg C, Lofmark S, Edlund C, Jansson JK.** 2007. Long-term ecological impacts of  
306 antibiotic administration on the human intestinal microbiota. *ISME J* **1**:56-66.
- 307 4. **Becattini S, Taur Y, Pamer EG.** 2016. Antibiotic-Induced Changes in the Intestinal  
308 Microbiota and Disease. *Trends Mol Med* **22**:458-478.
- 309 5. **Forsberg KJ, Reyes A, Wang B, Selleck EM, Sommer MO, Dantas G.** 2012. The shared  
310 antibiotic resistome of soil bacteria and human pathogens. *Science* **337**:1107-1111.
- 311 6. **Sohka T, Heins RA, Phelan RM, Greisler JM, Townsend CA, Ostermeier M.** 2009. An  
312 externally tunable bacterial band-pass filter. *Proc Natl Acad Sci U S A* **106**:10135-10140.
- 313 7. **Becattini S, Littmann ER, Carter RA, Kim SG, Morjaria SM, Ling L, Gyaltsen Y, Fontana  
314 E, Taur Y, Leiner IM, Pamer EG.** 2017. Commensal microbes provide first line defense  
315 against *Listeria monocytogenes* infection. *J Exp Med* **214**:1973-1989.
- 316 8. **Buffie CG, Jarchum I, Equinda M, Lipuma L, Gobourne A, Viale A, Ubeda C, Xavier J,  
317 Pamer EG.** 2012. Profound alterations of intestinal microbiota following a single dose of

- 318 clindamycin results in sustained susceptibility to *Clostridium difficile*-induced colitis.  
319 *Infect Immun* **80**:62-73.
- 320 9. **Pamer EG**. 2016. Resurrecting the intestinal microbiota to combat antibiotic-resistant  
321 pathogens. *Science* **352**:535-538.
- 322 10. **Leonard F, Andremont A, Leclerq B, Labia R, Tancrede C**. 1989. Use of beta-lactamase-  
323 producing anaerobes to prevent ceftriaxone from degrading intestinal resistance to  
324 colonization. *J Infect Dis* **160**:274-280.
- 325 11. **Chachaty E, Bourneix C, Renard S, Bonnay M, Andremont A**. 1993. Shedding of  
326 *Clostridium difficile*, fecal beta-lactamase activity, and gastrointestinal symptoms in 51  
327 volunteers treated with oral cefixime. *Antimicrob Agents Chemother* **37**:1432-1435.
- 328 12. **Gebhart D, Lok S, Clare S, Tomas M, Stares M, Scholl D, Donskey CJ, Lawley TD, Govoni**  
329 **GR**. 2015. A modified R-type bacteriocin specifically targeting *Clostridium difficile*  
330 prevents colonization of mice without affecting gut microbiota diversity. *MBio* **6**.
- 331 13. **Stiefel U, Nerandzic MM, Pultz MJ, Donskey CJ**. 2014. Gastrointestinal Colonization  
332 with a Cephalosporinase-Producing *Bacteroides* Species Preserves Colonization  
333 Resistance against Vancomycin-Resistant *Enterococcus* and *Clostridium difficile* in  
334 Cephalosporin-Treated Mice. *Antimicrobial Agents and Chemotherapy* **58**:4535-4542.
- 335 14. **Tarkkanen AM, Heinonen T, Jogi R, Mentula S, van der Rest ME, Donskey CJ,**  
336 **Kemppainen T, Gurbanov K, Nord CE**. 2009. P1A recombinant beta-lactamase prevents  
337 emergence of antimicrobial resistance in gut microflora of healthy subjects during  
338 intravenous administration of ampicillin. *Antimicrob Agents Chemother* **53**:2455-2462.
- 339 15. **Stiefel U, Harmoinen J, Koski P, Kaariainen S, Wickstrand N, Lindevall K, Pultz NJ,**  
340 **Bonomo RA, Helfand MS, Donskey CJ**. 2005. Orally administered recombinant metallo-  
341 beta-lactamase preserves colonization resistance of piperacillin-tazobactam-treated  
342 mice. *Antimicrob Agents Chemother* **49**:5190-5191.
- 343 16. **Harmoinen J, Mentula S, Heikkila M, van der Rest M, Rajala-Schultz PJ, Donskey CJ,**  
344 **Frias R, Koski P, Wickstrand N, Jousimies-Somer H, Westermarck E, Lindevall K**. 2004.  
345 Orally administered targeted recombinant Beta-lactamase prevents ampicillin-induced  
346 selective pressure on the gut microbiota: a novel approach to reducing antimicrobial  
347 resistance. *Antimicrob Agents Chemother* **48**:75-79.
- 348 17. **Stiefel U, Pultz NJ, Harmoinen J, Koski P, Lindevall K, Helfand MS, Donskey CJ**. 2003.  
349 Oral administration of beta-lactamase preserves colonization resistance of piperacillin-  
350 treated mice. *J Infect Dis* **188**:1605-1609.
- 351 18. **Brook I**. 2009. The role of beta-lactamase-producing-bacteria in mixed infections. *BMC*  
352 *Infect Dis* **9**:202.
- 353 19. **Brook I**. 2004. Beta-lactamase-producing bacteria in mixed infections. *Clin Microbiol*  
354 *Infect* **10**:777-784.
- 355 20. **Human Microbiome Project C**. 2012. Structure, function and diversity of the healthy  
356 human microbiome. *Nature* **486**:207-214.
- 357 21. **Kelsic ED, Zhao J, Vetsigian K, Kishony R**. 2015. Counteraction of antibiotic production  
358 and degradation stabilizes microbial communities. *Nature* **521**:516-519.
- 359 22. **Caballero S, Kim S, Carter RA, Leiner IM, Susac B, Miller L, Kim GJ, Ling L, Pamer EG**.  
360 2017. Cooperating Commensals Restore Colonization Resistance to Vancomycin-  
361 Resistant *Enterococcus faecium*. *Cell Host Microbe* **21**:592-602 e594.



- 362 23. **Zimmermann M, Zimmermann-Kogadeeva M, Wegmann R, Goodman AL.** 2019.  
363 Mapping human microbiome drug metabolism by gut bacteria and their genes. *Nature*  
364 **570**:462-467.
- 365 24. **Zimmermann M, Zimmermann-Kogadeeva M, Wegmann R, Goodman AL.** 2019.  
366 Separating host and microbiome contributions to drug pharmacokinetics and toxicity.  
367 *Science* **363**.  
368

**Figure 1**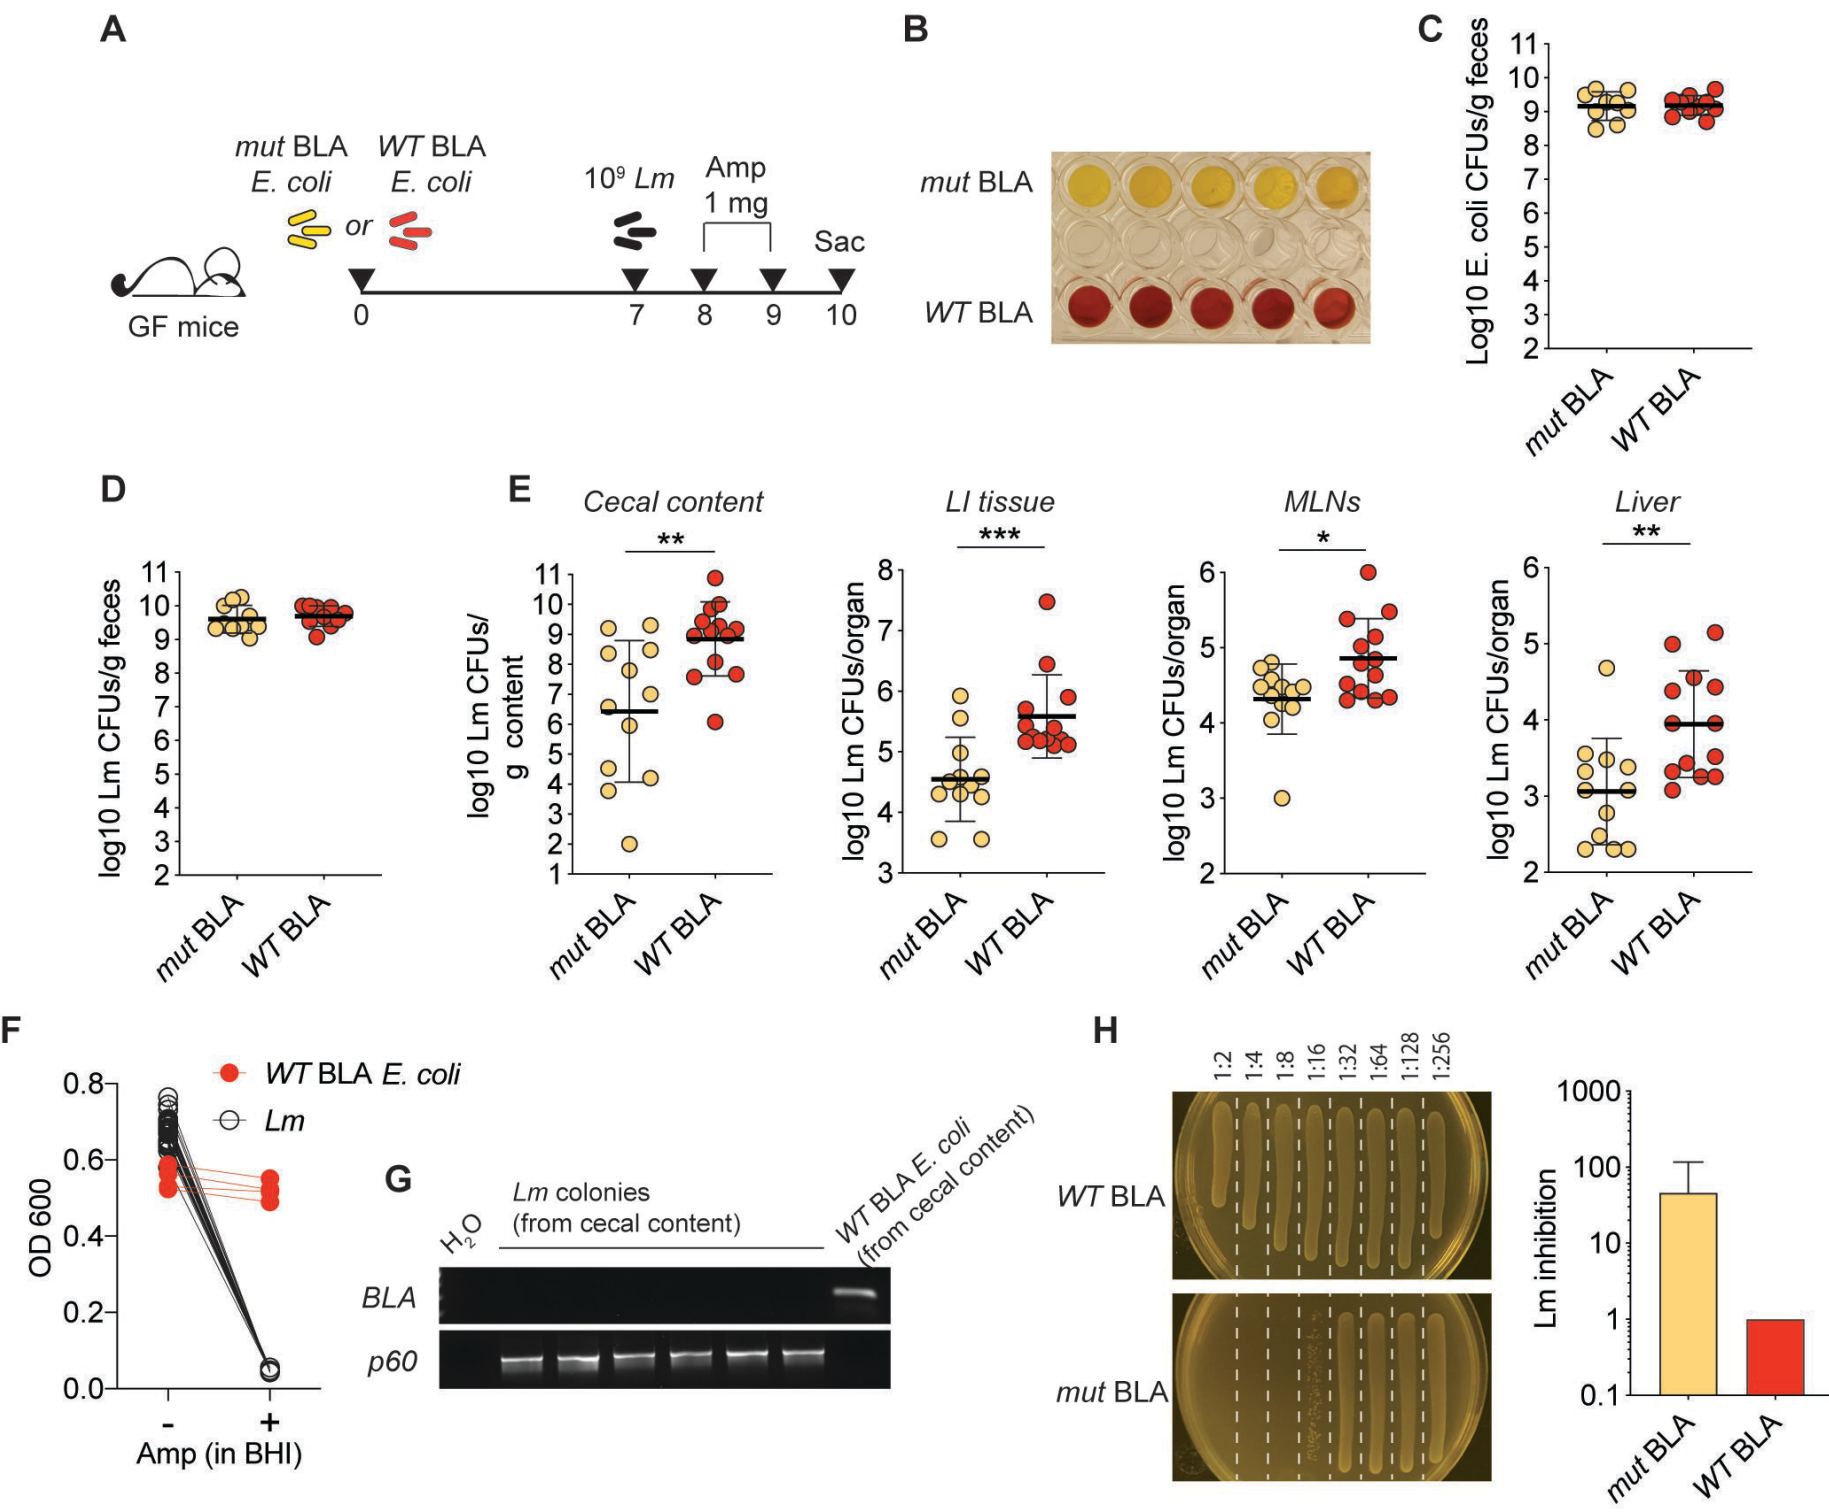

# Figure 2

**A**

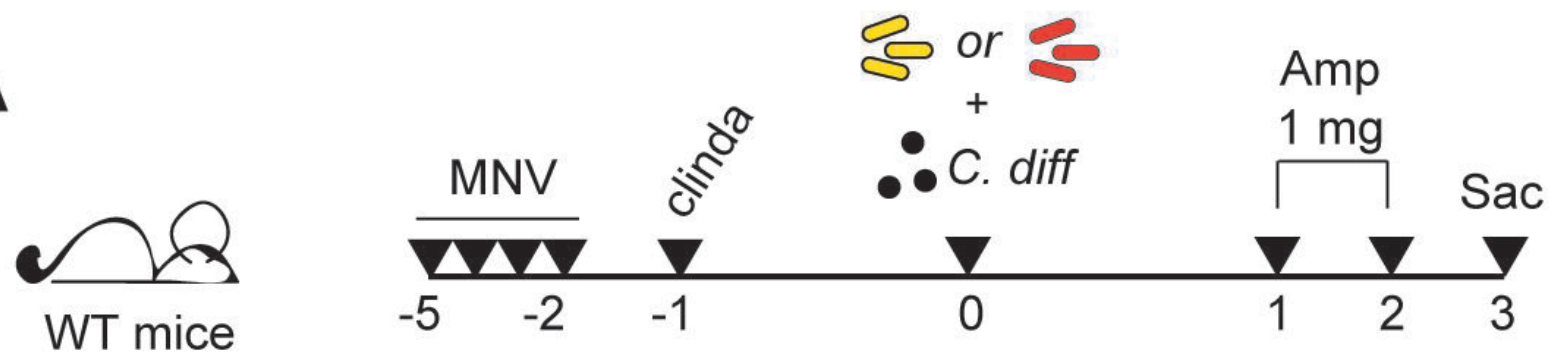

**B**

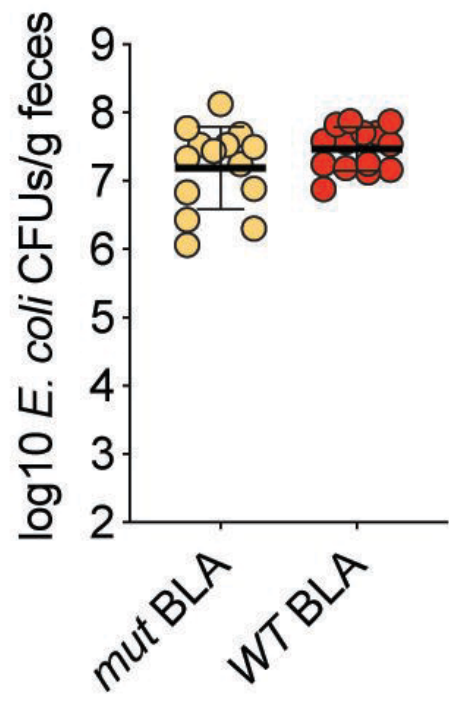

**C**

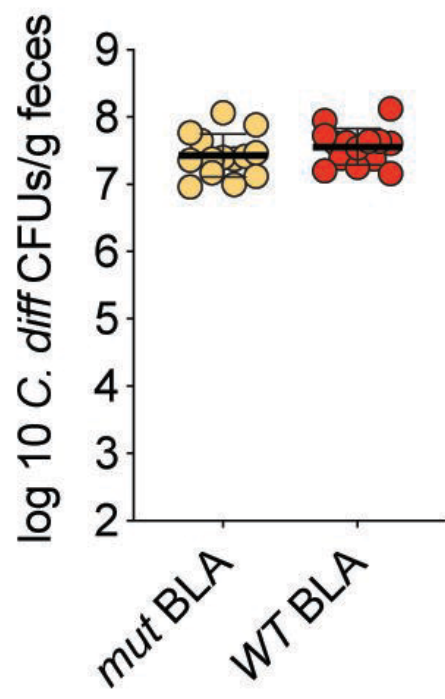

**D**

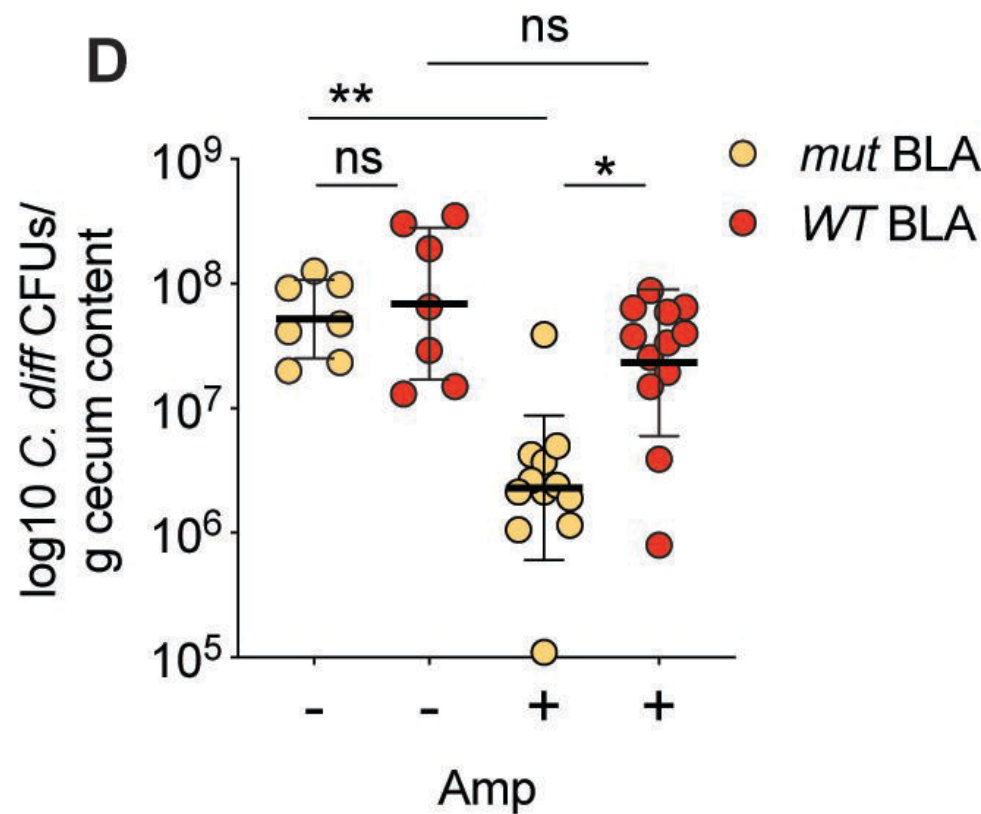

# Supplementary Figure 1

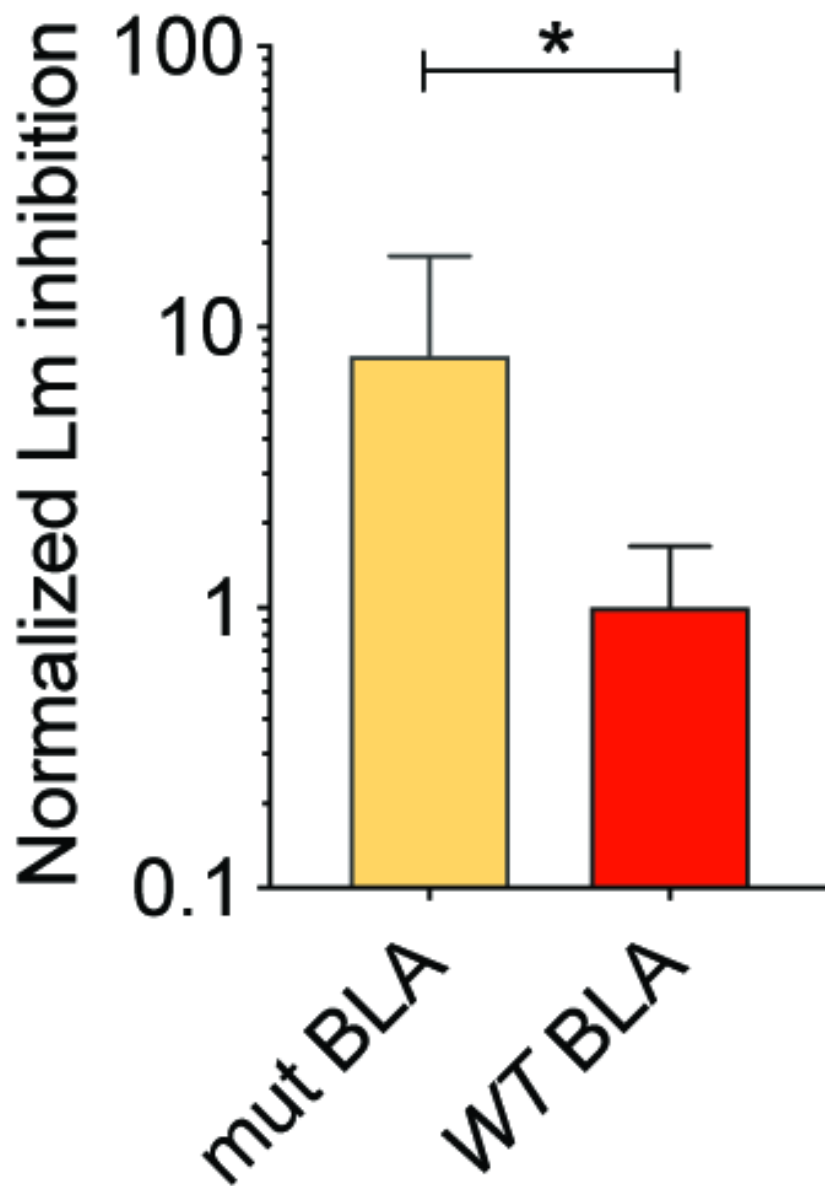

# Supplementary Figure 2

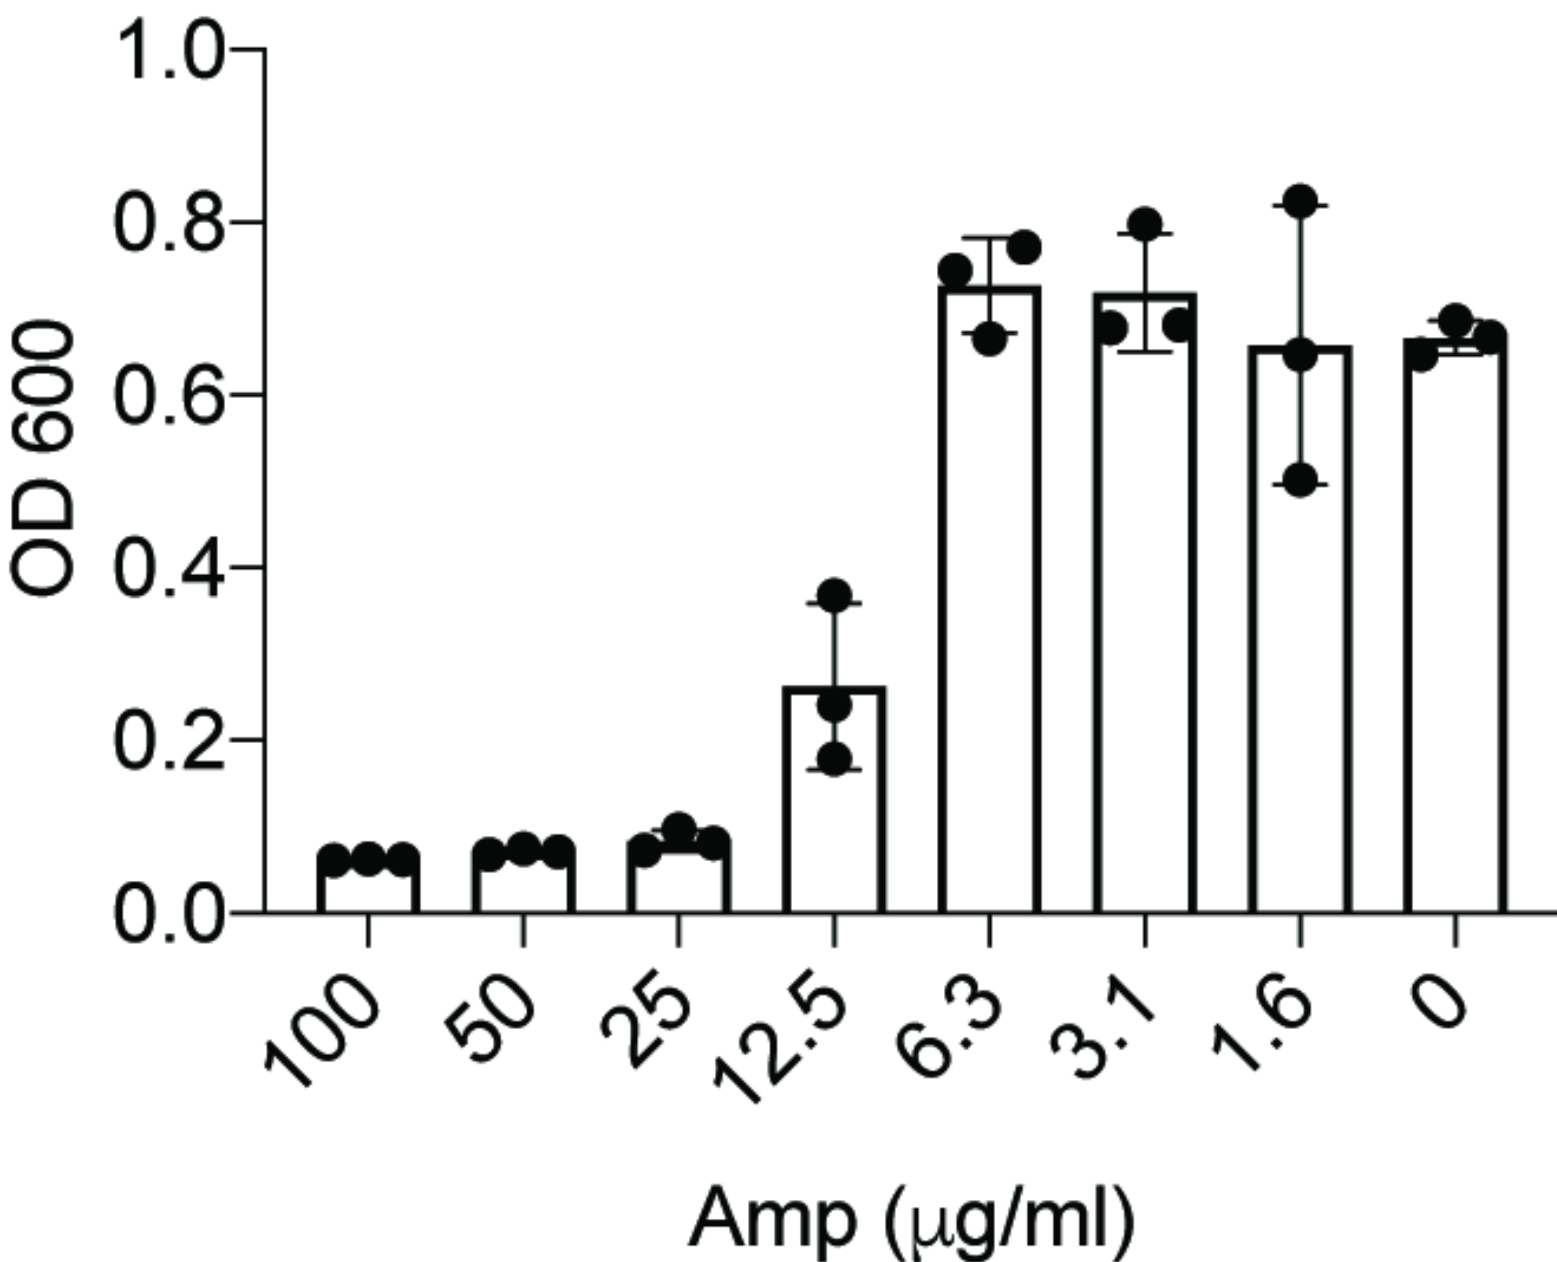

Source: https://www.biorxiv.org/content/10.1101/870931v1.full.pdf
